# Supplementary material
Source: PubMed Central journal article supplement (PMC7875252)
Supplement: NIHMS1654706-supplement-009254_-_Supplemental_Material.pdf [file NIHMS1654706-supplement-009254_-_Supplemental_Material.pdf]

## SUPPLEMENTAL MATERIAL

### EXPANDED METHODS

**Patient Sample Collection** For heart failure patients, left ventricle samples, at the level of the anterior papillary muscle, were collected in the operating room and transported in ice-cold cardioplegia, flash frozen within 20 minutes of excision, and stored at -80°C prior to utilization. For the NF set, hearts were arrested *in situ* using ice-cold cardioplegia solution, transported on wet ice, and full- thickness LV samples flash frozen in liquid nitrogen within 95 minutes of explantation. Though individual humans can differ considerably in their 'chronotype' with associated differences in underlying circadian gene expression patterns<sup>1</sup>, we have no information of the 'chronotypes' of the patients whose heart tissues were studied.

**Reason Why Non-failing Hearts were Rejected for Transplantation** Twenty six of twenty seven 'control' hearts were non-failing but were not suitable for transplantation for a variety of reasons; donor age (over 50) 11; cardiac 'quality' (assessed by ultrasound, typically based upon systolic function or ventricular wall thickness) or HX of CVD or hypertension 11; one each malignancy, neurocardiogenic shock, Ehlers-Danlos syndrome, or drug overdose. One non-failing heart was en route for transplantation but acute instability of the intended recipient precluded transplant surgery

**Data Processing** Local collection time was converted to fractional hours and normalized relative to the Eastern Standard Time (EST) of sunrise as reported by United States Naval Observatory (<http://www.usno.navy.mil/USNO/astronomical-applications>), after correction from Daylight Savings to Eastern Standard Time when appropriate for the date (day/month/year) of sample collection. With Hours After Sunrise (HASR) set at 0 for sunrise, and the yearly average for time of sunrise in Pittsburgh at approximately 6:18 AM EST, one can relate the HASR to the

yearly average of the local EST TOD by adding 6.3 hours. In addition, a prior report<sup>2</sup> referenced time of day sample collection in Vienna Austria, whereas this study reports as hours after sunrise in Pittsburgh. While Vienna has a higher latitude and more variable year-round length of day / average TOD for sunrise, one can reasonably approximate Pittsburgh acrophase reported as HASR to Vienna TOD by adding 6.3 hours to the Pittsburgh HASR data.

### **Supplemental References:**

1. Brown SA, Kunz D, Dumas A, Westermark PO, Vanselow K, Tilmann-Wahnschaffe A, Herzel H, Kramer A. Molecular insights into human daily behavior. *Proc Natl Acad Sci*. 2008;105:1602-7.

2. Leibetseder V, Humpeler S, Svoboda M, Schmid D, Thalhammer T, Zuckermann A, Marktl W, Ekmekcioglu C. Clock genes display rhythmic expression in human hearts. *Chronobiol Int*. 2009;26:621-36.

### A) COMMERCIAL SOURCE PRIMERS

| QIAGEN<br>QUANTITECT<br>PRIMER | GENE    | QIAGEN<br>QUANTITECT<br>PRIMER | GENE  |
|--------------------------------|---------|--------------------------------|-------|
| QT00011844                     | ARNTL   | QT00001022                     | KCNJ2 |
| QT00077231                     | ATP2A2  | QT01157996                     | KCNJ8 |
| QT00053480                     | CACNA1C | QT00039396                     | KCNK1 |
| QT00055755                     | DBP     | QT00016065                     | KCNQ1 |
| QT01192646                     | GAPDH   | QT00061411                     | KCNS3 |
| QT00224112                     | KCNA4   | QT00043449                     | KLF15 |
| QT01003177                     | KCNA5   | QT00013944                     | NFIL3 |
| QT01003184                     | KCNA7   | QT00000413                     | NR1D1 |
| QT00014749                     | KCNB1   | QT00011207                     | PER2  |
| QT01669150                     | KCNC4   | QT00066080                     | SCN1B |
| QT01874740                     | KCND3   | QT00091812                     | SCN5A |
| QT01003254                     | KCNH2   | QT01886675                     | SIRT1 |
| QT00016254                     | KCNIP2  | QT00075376                     | SL8A1 |

### B) SELF-DESIGNED PRIMERS

| GENE  | FORWARD PRIMER<br>(REFERENCE NUCLEOTIDES)  | REVERSE PRIMER<br>(REFERENCE NUCLEOTIDES) | GENEBANK<br>REFERENCE |
|-------|--------------------------------------------|-------------------------------------------|-----------------------|
| ARNTL | GCTTTGAGGTGACCAAGTCC<br>(223-238)          | TCTGCCATTGGATGATCTGA<br>(467-448)         | NM_001178.5           |
| DBP   | CGAGACCTTTGACCCTCGAAG<br>AA<br>(1216-1237) | GACCGCTTGGCTGCCTCGTT<br>(1371-1352)       | NM_001352.4           |
| NR1D1 | CCGTGACCTTTCTCAGCATGA<br>(2011-2031)       | CACTGTCTGGTCCTTCACGTT<br>G<br>(2116-2095) | NM_021724.4           |
| PER2  | CTGCAAACCTGGCACTTCTC<br>(3300-3319)        | GTGTCTGAGGGTTCATCACG<br>(3368-3349)       | NM_022817.2           |

Table s1. RT-PCR Primers

| GROUP | RAYLEIGH Z STATISTIC | RAYLEIGH CRITICAL VALUE | Rayleigh Ho:                      | Ho Accepted (Statistic < Critical Value)? |
|-------|----------------------|-------------------------|-----------------------------------|-------------------------------------------|
| F1    | 1.885                | 2.971                   | Ho: data is uniformly distributed | Yes                                       |
| F2    | 0.553                | 2.976                   |                                   | Yes                                       |
| NF    | 1.215                | 2.988                   |                                   | Yes                                       |

|    | RAO SPACING STATISTIC | RAO p<0.05 SPACING VALUE | Rao Ho:                           | Ho Accepted? |
|----|-----------------------|--------------------------|-----------------------------------|--------------|
| F1 | 116.9                 | 152                      | Ho: data is uniformly distributed | Yes          |
| F2 | 134.2                 | 155                      |                                   | Yes          |
| NF | 111.1                 | 158                      |                                   | Yes          |

**Table s2:** Rayleigh and Rao Spacing test statistics. Uniformity Testing; Temporal Distribution of Sample Collection. Ho Accepted when (Statistic < Critical Value).

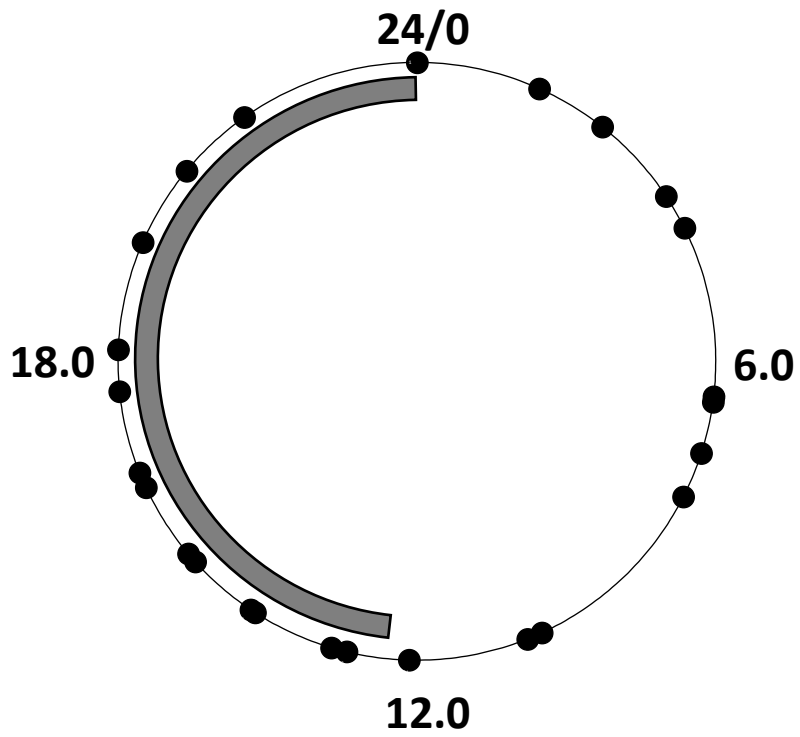

**Figure s1.** Time of collection of human non-failing heart samples. Data in hours after sunrise (HASR). n=27. Symbols as in Figure 1.

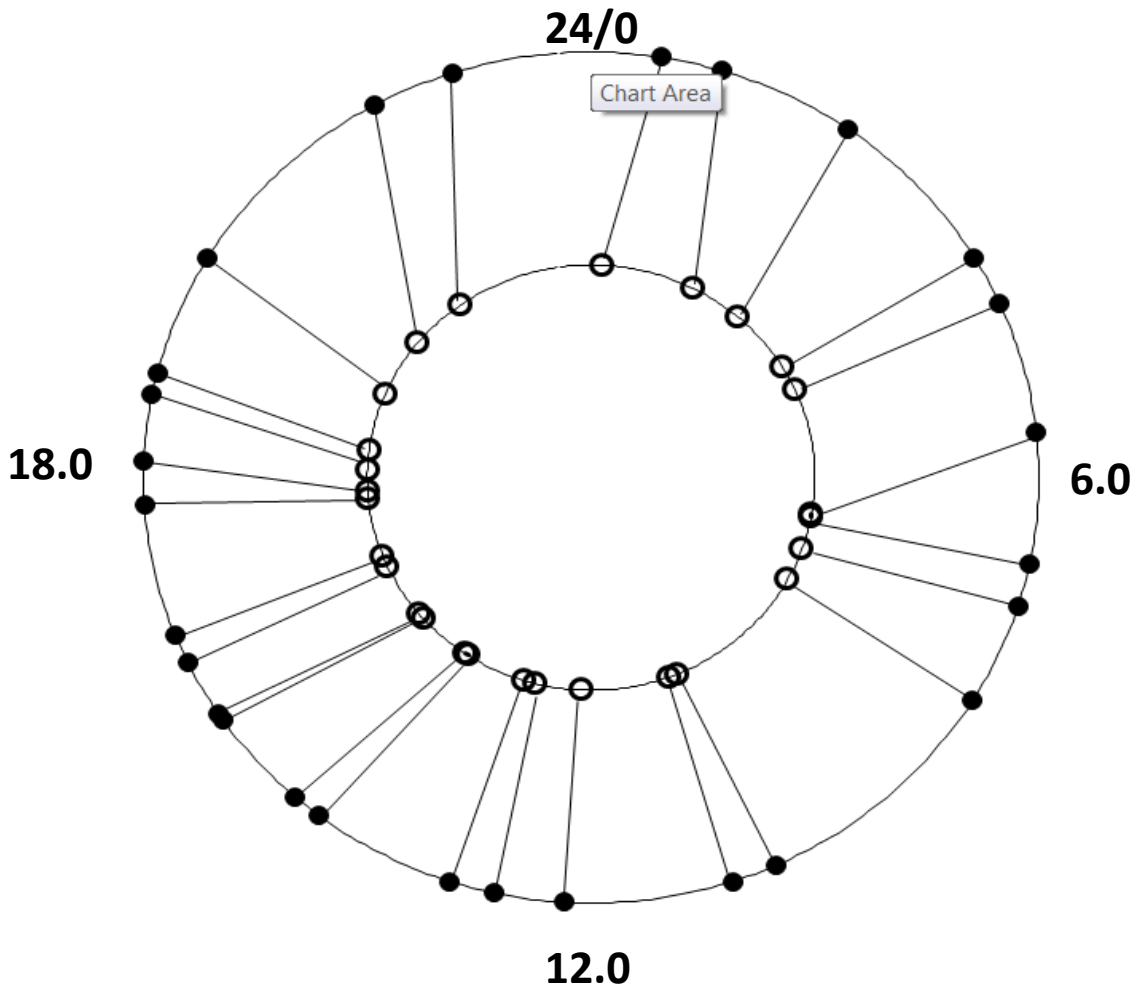

**Figure s2.** Temporally matched set of 27 failing and non-failing human heart samples. Inner circle; non-failing samples, each open dot represents collection time of one sample (n=27). Outer circle; each closed dot represents one sample from data presented in Figure 2 (n=27) chosen to temporally match one non-failing sample.
